# Supplementary material
Source: Springer Nature journal article supplement (https://www.springermedizin.de/resource/supplementary/12936_2006_381_MOESM1_ESM.pdf/9547682)
Supplement: MOESM1 [file 9547682]

A

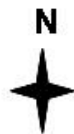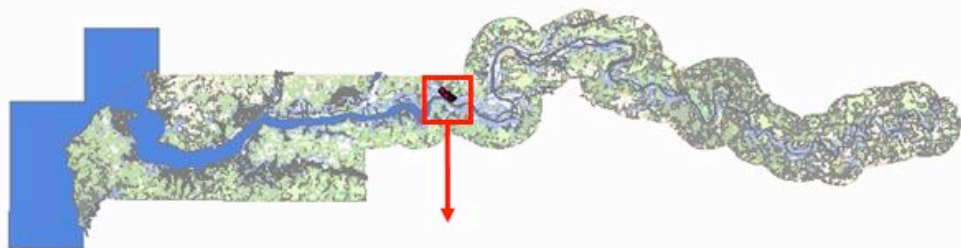

B

Farafenni

Kunjo

Sanka Lang

Kerr Juka

Dasilameh

Njanjen

Saback Ngaine

Saback Sukoto Mandinka

Sukoto Fula

Ngain Bereto

Bereto

Bamba Tenda

Banta-Su

Kataba Tata

Kataba Mbap

Kataba Mandinka

Jambang-Ya

Tamba-Koto

## Legend

- pop\_area
- Water and rivers

## veg\_pol

- <all other values>

## Vegetation Key

- Cultivation
- Forest
- Mangrove
- Plain Ground
- Swamp

0 0.9 1.8  
Kilometers
